# Supplementary material for: Thermoresponsive polyamic acid-conjugated gold nanocarrier for enhanced light-triggered 5-fluorouracil release
Source: Royal Society of Chemistry journal article supplement (doi:10.1039/c6ra27563j), 2017-01-01
Supplement: c6ra27563j1.pdf [file c6ra27563j1.pdf]

## **Thermoresponsive polyamic acid-conjugated gold nanocarrier for enhanced light-triggered 5-fluorouracil release**

Pa Fan Hsiao <sup>b,c,d</sup>, Rajeshkumar Anbazhagan <sup>a</sup>, Chou Hsiao-Ying <sup>a</sup>, Adhisankar Vadivelmurugan <sup>a</sup>, Hsieh-Chih Tsai <sup>\*a</sup>.

a. Graduate Institute of Applied Science and Technology, National Taiwan University of Science and Technology, Taipei 106, Taiwan.

b. Department of Dermatology, Mackay Memorial Hospital, Taipei, Taiwan

c. Mackay Medicine, Nursing and Management College, Taipei, Taiwan

d. Mackay Medical College, New Taipei City, Taiwan.

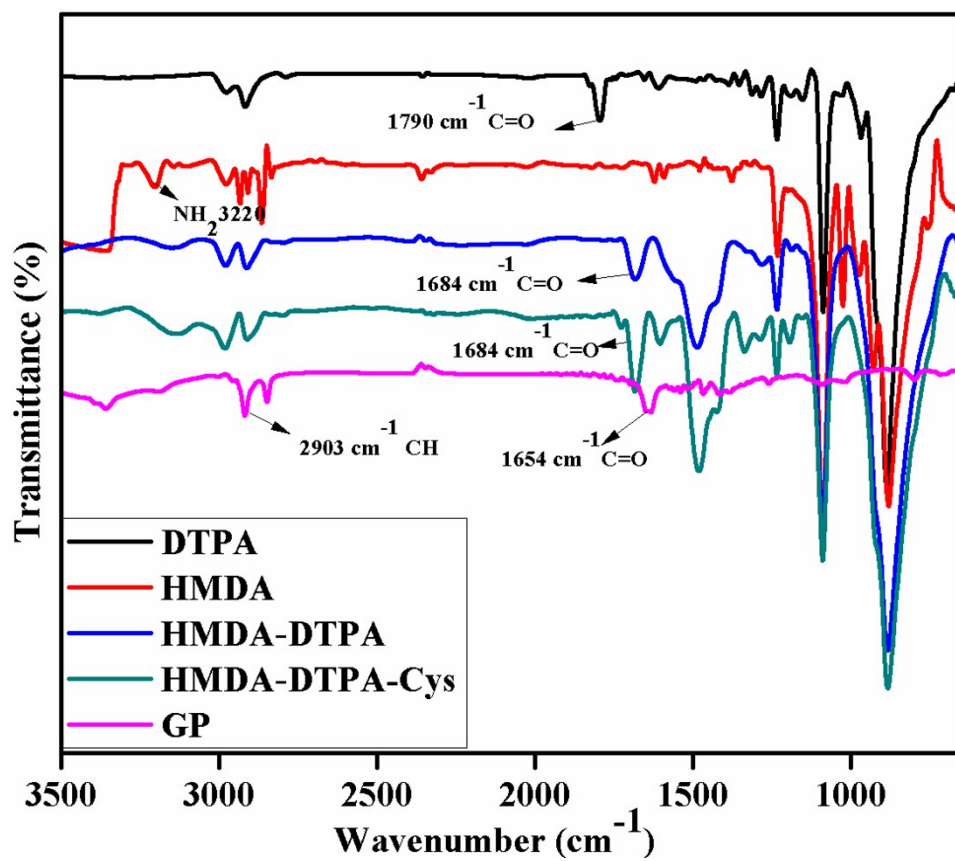

**Figure S1:** Shows the FT-IR Spectra of synthesized polymer.

## Measurement Results

### Native Gold 2.nzt

#### Measurement Results

Date : 2015年8月4日 下午 07:17:22  
 Measurement Type : Zeta Potential  
 Sample Name : Native Gold  
 Temperature of the holder : 25.0 摄氏度  
 Viscosity of the dispersion medium : 0.896 mPa·s  
 Conductivity : 0.081 mS/cm  
 Electrode Voltage : 3.8 V

#### Calculation Results

| Peak No. | Zeta Potential | Electrophoretic Mobility      |
|----------|----------------|-------------------------------|
| 1        | -25.7 mV       | -0.000199 cm <sup>2</sup> /Vs |
| 2        | ---            | ---                           |
| 3        | ---            | ---                           |

Zeta Potential (Mean) : -25.7 mV  
 Electrophoretic Mobility mean : -0.000199 cm<sup>2</sup>/Vs

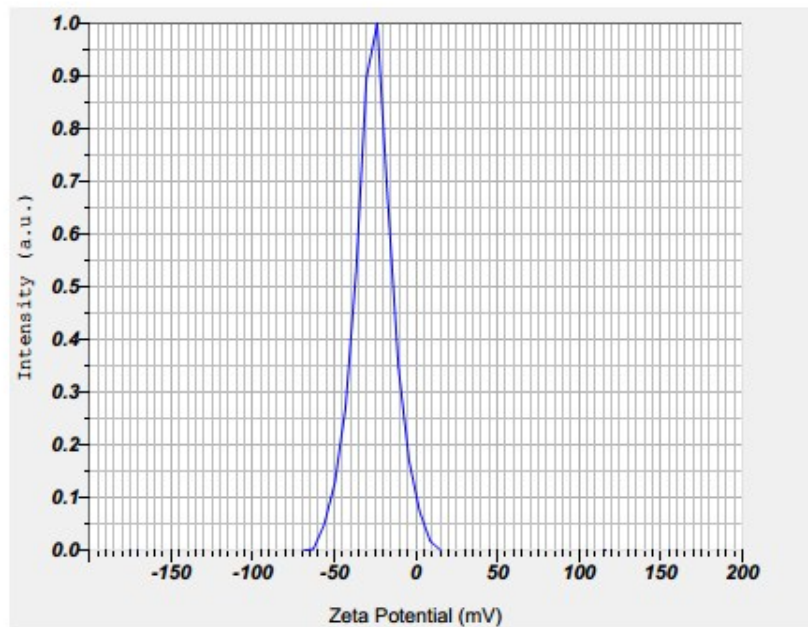

**Figure S2:** Zeta Potential of Synthesized GPNs nanoparticle.

## Measurement Results

### Polymer Gold 2.nzt

#### Measurement Results

Date : 2015年8月4日 下午 08:12:24  
Measurement Type : Zeta Potential  
Sample Name : Polymer Gold  
Temperature of the holder : 25.0 铜  
Viscosity of the dispersion medium : 0.895 mPa新  
Conductivity : 0.141 mS/cm  
Electrode Voltage : 3.4 V

#### Calculation Results

| Peak No. | Zeta Potential | Electrophoretic Mobility      |
|----------|----------------|-------------------------------|
| 1        | -32.9 mV       | -0.000255 cm <sup>2</sup> /Vs |
| 2        | -- mV          | -- cm <sup>2</sup> /Vs        |
| 3        | -- mV          | -- cm <sup>2</sup> /Vs        |

Zeta Potential (Mean) : -32.9 mV  
Electrophoretic Mobility mean : -0.000255 cm<sup>2</sup>/Vs

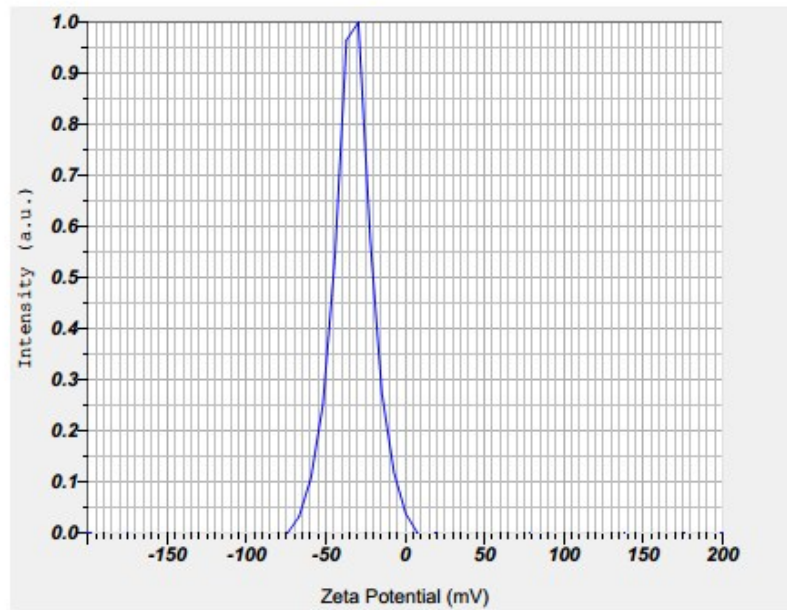

Figure S3: Zeta Potential of Synthesized GP nanoparticle.

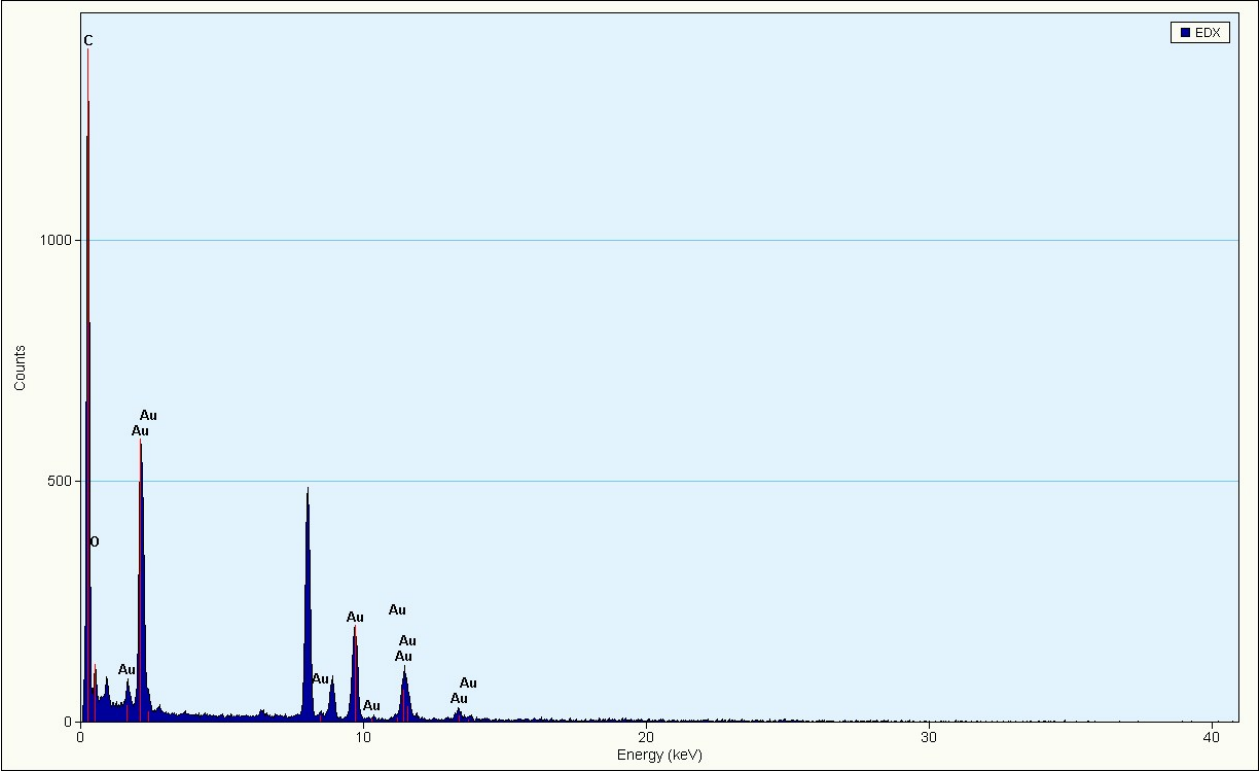

**Figure S4:** EDX spectrum of Synthesized GP nanocluster.
